# Supplementary material
Source: Springer Nature journal article supplement (https://www.springermedizin.de/resource/supplementary/12939_2012_373_MOESM3_ESM.pdf/9551000)

## Men

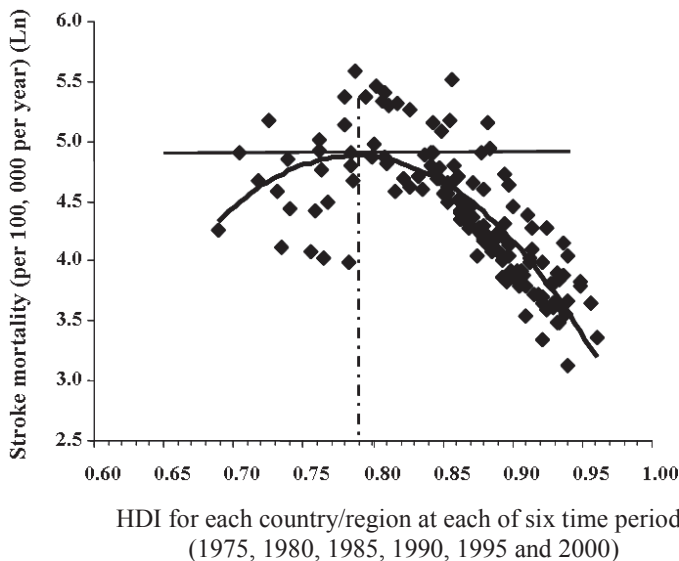

## Women

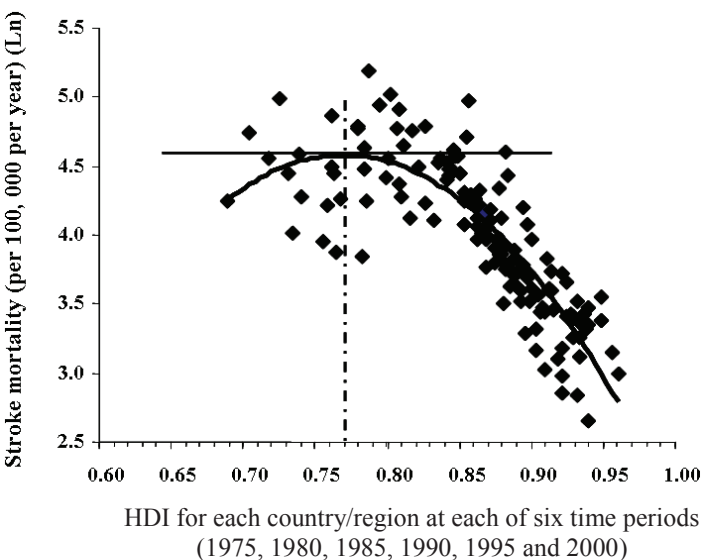

Supplement: MOESM3 [file 9551000]
